# Supplementary material
Source: PubMed Central journal article supplement (PMC8108562)
Supplement: NIHMS1693696-supplement-5.pdf [file NIHMS1693696-supplement-5.pdf]

## Supplemental Tables

## Supplemental Table 1.

| <b>Condition</b>                                                                                                                                                                                                                                                                                                                     | <b>ICD-10 family or specific codes</b> |
|--------------------------------------------------------------------------------------------------------------------------------------------------------------------------------------------------------------------------------------------------------------------------------------------------------------------------------------|----------------------------------------|
| <b>LAL Deficiency</b>                                                                                                                                                                                                                                                                                                                | E755                                   |
| <b>Fracture</b>                                                                                                                                                                                                                                                                                                                      |                                        |
| Cervical vertebra and other parts of neck                                                                                                                                                                                                                                                                                            | S12 family                             |
| Thoracic vertebra                                                                                                                                                                                                                                                                                                                    | S220 family                            |
| Lumbar spine and pelvis                                                                                                                                                                                                                                                                                                              | S32 family                             |
| Shoulder and upper arm                                                                                                                                                                                                                                                                                                               | S42 family                             |
| Forearm                                                                                                                                                                                                                                                                                                                              | S52 family                             |
| Femur                                                                                                                                                                                                                                                                                                                                | S72 family                             |
| Lower leg, including ankle                                                                                                                                                                                                                                                                                                           | S82 family                             |
| Stress fracture, site unspecified                                                                                                                                                                                                                                                                                                    | M843 family                            |
| Pathological fracture, not elsewhere classified, site unspecified                                                                                                                                                                                                                                                                    | M844 family                            |
| Non-traumatic fracture, not elsewhere classified, site unspecified                                                                                                                                                                                                                                                                   | M847 family                            |
| Osteoporosis with current pathological fracture, site unspecified                                                                                                                                                                                                                                                                    | M80 family                             |
| <b>Osteoporosis</b>                                                                                                                                                                                                                                                                                                                  |                                        |
| With or without current pathological fracture                                                                                                                                                                                                                                                                                        | M80 family, M81 family                 |
| <b>Ischemic heart disease</b>                                                                                                                                                                                                                                                                                                        |                                        |
| Angina pectoris; acute myocardial infarction; subsequent ST elevation (STEMI) and non-ST elevation (NSTEMI) myocardial infarction; chronic ischemic heart disease                                                                                                                                                                    | I20-22 families, I25 family            |
| <b>Cerebrovascular disease</b>                                                                                                                                                                                                                                                                                                       |                                        |
| Nontraumatic subarachnoid or intracerebral hemorrhage; other and unspecified nontraumatic intracranial hemorrhage; cerebral infarction; occlusion and stenosis of precerebral or cerebral arteries, not resulting in cerebral infarction; other cerebrovascular diseases; cerebrovascular disorders in diseases classified elsewhere | I60-68 families                        |
| <b>Heart failure</b>                                                                                                                                                                                                                                                                                                                 |                                        |
| Hypertensive heart disease with heart failure; hypertensive heart and chronic kidney disease with heart failure, and stage 1 through stage 5 chronic kidney disease, or end stage renal disease, or unspecified chronic kidney disease;                                                                                              | I11.0, I13.0, I13.2, I50 family        |
| <b>Hypertension</b>                                                                                                                                                                                                                                                                                                                  |                                        |
| Essential (primary) hypertension; hypertensive heart, chronic kidney disease, or heart and chronic kidney disease; secondary hypertension; hypertensive crisis                                                                                                                                                                       | I10-16 families                        |
| <b>Type 2 diabetes mellitus</b>                                                                                                                                                                                                                                                                                                      | E11 family                             |

International Classification of Diseases, Tenth Revision, Clinical Modification (ICD-10) codes used to identify conditions.
